# Supplementary material for: Deaths involving COVID-19 by disability status: a retrospective analysis of 29 million adults during the first two waves of the Coronavirus pandemic in England
Source: bioRxiv or medRxiv preprint supplement (doi:10.1101/2021.06.10.21258693), 2021-06-13
Supplement: Supplementary file [file media-1.pdf]

**Table S1.** Standardised differences comparing people with and without disability for all the covariates included in the modelling

| Variable                                                      | Level                                        | <i>d</i> |
|---------------------------------------------------------------|----------------------------------------------|----------|
| Age (years)                                                   | Mean                                         | 0.82     |
| Place of residence                                            | Private household                            | 0.16     |
|                                                               | Care home                                    | 0.16     |
|                                                               | Other communal establishments                | 0.03     |
| Ethnicity                                                     | Bangladeshi                                  | 0.01     |
|                                                               | Black African                                | 0.06     |
|                                                               | Black Caribbean                              | 0.01     |
|                                                               | Chinese                                      | 0.05     |
|                                                               | Indian                                       | 0.02     |
|                                                               | Mixed                                        | 0.02     |
|                                                               | Other                                        | 0.02     |
|                                                               | Pakistani                                    | 0.01     |
|                                                               | White British                                | 0.08     |
|                                                               | White other                                  | 0.08     |
| Level of highest qualification                                | No qualification                             | 0.48     |
|                                                               | 1-4 GCSE/O-levels                            | 0.05     |
|                                                               | 5+ GCSE/O-levels                             | 0.10     |
|                                                               | Apprenticeship                               | 0.02     |
|                                                               | 2+ A-levels or equivalent                    | 0.16     |
|                                                               | Degree or above                              | 0.33     |
|                                                               | Other                                        | 0.02     |
| Keyworker type                                                | Not keyworker                                | 0.10     |
|                                                               | Education & childcare                        | 0.09     |
|                                                               | Food & necessary goods                       | 0.02     |
|                                                               | Health & social care                         | 0.03     |
|                                                               | Key public services                          | 0.04     |
|                                                               | National & local government                  | <0.01    |
|                                                               | Public safety & national security            | 0.03     |
|                                                               | Transport                                    | 0.02     |
|                                                               | Utilities & communication                    | 0.07     |
|                                                               | Individual exposure to disease score (0-100) | Mean     |
| Individual proximity to others score (0-100)                  | Mean                                         | 0.19     |
| Number of admissions to Admitted Patient Care in past 3 years | 0                                            | 0.39     |
|                                                               | 1                                            | 0.06     |
|                                                               | 2-3                                          | 0.21     |
|                                                               | 4-5                                          | 0.18     |
|                                                               | 6-9                                          | 0.16     |
|                                                               | 10+                                          | 0.11     |
| Number of days spent in Admitted Patient Care in past 3 years | 0                                            | 0.26     |
|                                                               | 1                                            | 0.14     |
|                                                               | 2-4                                          | 0.14     |
|                                                               | 5-9                                          | 0.10     |
|                                                               | 10-19                                        | 0.08     |
|                                                               | 20-39                                        | 0.05     |
|                                                               | 40-69                                        | 0.03     |
|                                                               | 70+                                          | 0.02     |

| <b>Variable</b>                                  | <b>Level</b>                                             | <b>d</b> |
|--------------------------------------------------|----------------------------------------------------------|----------|
| Body mass index (kg/m <sup>2</sup> )             | < 18.5                                                   | 0.05     |
|                                                  | 18.5 to 25                                               | 0.09     |
|                                                  | 25 to 30                                                 | 0.01     |
|                                                  | >= 30                                                    | 0.18     |
|                                                  | Unknown                                                  | 0.09     |
| Chronic kidney disease (CKD)                     | No CKD                                                   | 0.15     |
|                                                  | Stage 3 CKD                                              | 0.13     |
|                                                  | Stage 4 CKD                                              | 0.06     |
|                                                  | Stage 5 CKD                                              | 0.04     |
| Cancer & immunosuppression                       | Blood cancer                                             | 0.07     |
|                                                  | Respiratory cancer                                       | 0.03     |
|                                                  | Solid organ transplant                                   | 0.02     |
|                                                  | Prescribed immunosuppressants                            | 0.01     |
|                                                  | Prescribed antileukotriene or long-acting beta2-agonists | 0.29     |
|                                                  | Prescribed regular prednisolone                          | 0.15     |
| Other health conditions                          | Asthma                                                   | 0.14     |
|                                                  | Atrial fibrillation                                      | 0.22     |
|                                                  | Chronic obstructive pulmonary disease                    | 0.26     |
|                                                  | Cirrhosis of the liver                                   | 0.06     |
|                                                  | Congestive cardiac failure                               | 0.19     |
|                                                  | Coronary heart disease                                   | 0.29     |
|                                                  | Dementia                                                 | 0.17     |
|                                                  | Diabetes                                                 | 0.32     |
|                                                  | Epilepsy                                                 | 0.13     |
|                                                  | Osteoporotic fracture                                    | 0.04     |
|                                                  | Parkinson's disease                                      | 0.08     |
|                                                  | Peripheral vascular disease                              | 0.14     |
|                                                  | Pulmonary hypertension or pulmonary fibrosis             | 0.09     |
|                                                  | Rare pulmonary diseases                                  | 0.12     |
|                                                  | Rare neurological conditions                             | 0.03     |
|                                                  | Rheumatoid arthritis or systemic lupus erythematosus     | 0.14     |
|                                                  | Mental illness                                           | 0.25     |
|                                                  | Stroke or transient ischaemic attack                     | 0.21     |
| Venous thromboembolism                           | 0.02                                                     |          |
| Region                                           | East of England                                          | 0.04     |
|                                                  | East Midlands                                            | 0.01     |
|                                                  | London                                                   | 0.04     |
|                                                  | North East                                               | 0.05     |
|                                                  | North West                                               | 0.06     |
|                                                  | South East                                               | 0.08     |
|                                                  | South West                                               | 0.01     |
|                                                  | West Midlands                                            | 0.03     |
|                                                  | Yorkshire and the Humber                                 | 0.02     |
| Population density (people per square kilometre) | Mean                                                     | 0.05     |
| Index of Multiple Deprivation                    | Decile 1 (most deprived)                                 | 0.14     |
|                                                  | Decile 2                                                 | 0.09     |
|                                                  | Decile 3                                                 | 0.05     |
|                                                  | Decile 4                                                 | 0.02     |
|                                                  | Decile 5                                                 | 0.01     |
|                                                  | Decile 6                                                 | 0.04     |

| <b>Variable</b>                                                                          | <b>Level</b>                                   | <b>d</b> |
|------------------------------------------------------------------------------------------|------------------------------------------------|----------|
|                                                                                          | Decile 7                                       | 0.06     |
|                                                                                          | Decile 8                                       | 0.08     |
|                                                                                          | Decile 9                                       | 0.10     |
|                                                                                          | Decile 10 (least deprived)                     | 0.14     |
| National Statistics Socio-Economic Classification (NS-SEC) of household reference person | Higher managerial and professional occupations | 0.41     |
|                                                                                          | Intermediate occupations                       | 0.15     |
|                                                                                          | Routine and manual occupations                 | <0.01    |
|                                                                                          | Never worked or long-term unemployed           | 0.13     |
|                                                                                          | Not applicable                                 | 0.41     |
| Tenure of household                                                                      | Owned outright                                 | 0.19     |
|                                                                                          | Owned with a mortgage                          | 0.42     |
|                                                                                          | Shared ownership                               | 0.02     |
|                                                                                          | Social rented from council                     | 0.21     |
|                                                                                          | Other social rented                            | 0.18     |
|                                                                                          | Private rented                                 | 0.14     |
|                                                                                          | Living rent free                               | 0.03     |
| Household size                                                                           | 1-2 people                                     | 0.27     |
|                                                                                          | 3-4 people                                     | 0.31     |
|                                                                                          | 5-6 people                                     | 0.09     |
|                                                                                          | 7+ people                                      | 0.02     |
| Family status                                                                            | Not in a family                                | 0.20     |
|                                                                                          | In a couple family                             | 0.24     |
|                                                                                          | In a lone parent family                        | 0.02     |
| Household composition                                                                    | Single-adult household                         | 0.30     |
|                                                                                          | Two-adult household                            | 0.01     |
|                                                                                          | Multi-generational household                   | 0.02     |
|                                                                                          | Other 3+ adults                                | 0.17     |
|                                                                                          | Child in household                             | 0.34     |
| Keyworker in household                                                                   | Yes                                            | 0.16     |
|                                                                                          | No                                             | 0.11     |
| Household exposure to disease score                                                      | 0.0 - 20.0                                     | 0.04     |
|                                                                                          | 20.1 – 40.0                                    | 0.03     |
|                                                                                          | 40.1 – 60.0                                    | 0.02     |
|                                                                                          | 60.1 – 80.0                                    | 0.06     |
|                                                                                          | 80.1 – 100                                     | 0.06     |
| Household proximity to others score                                                      | 0.0 - 20.0                                     | 0.14     |
|                                                                                          | 20.1 – 40.0                                    | 0.02     |
|                                                                                          | 40.1 – 60.0                                    | 0.03     |
|                                                                                          | 60.1 – 80.0                                    | 0.01     |
|                                                                                          | 80.1 – 100                                     | 0.10     |

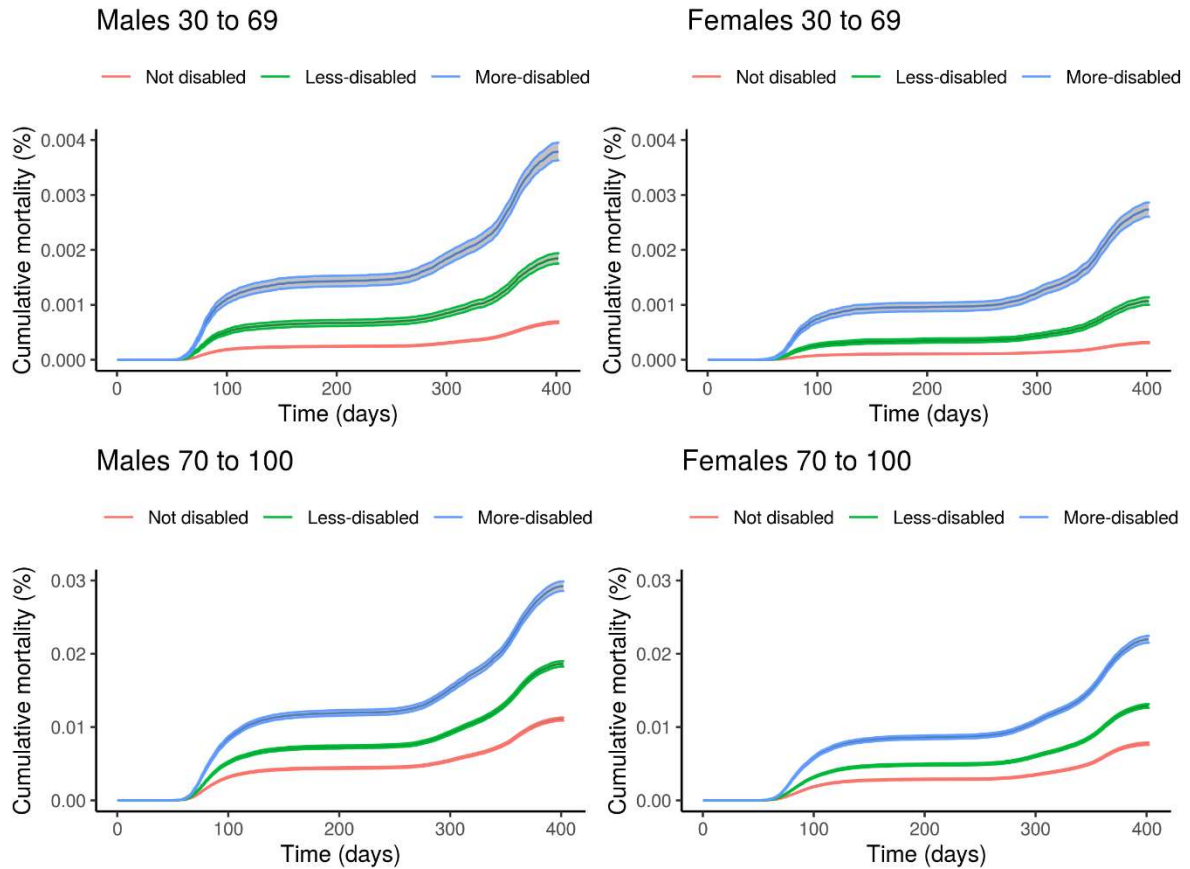

**Figure S1.** Age-adjusted cumulative COVID-19 related mortality during the outcome period (24 January 2020 to 28 February 2021) with bootstrapped 95% confidence intervals by disability status, stratified by age group (30 to 69 years and 70 to 100 years) and sex.

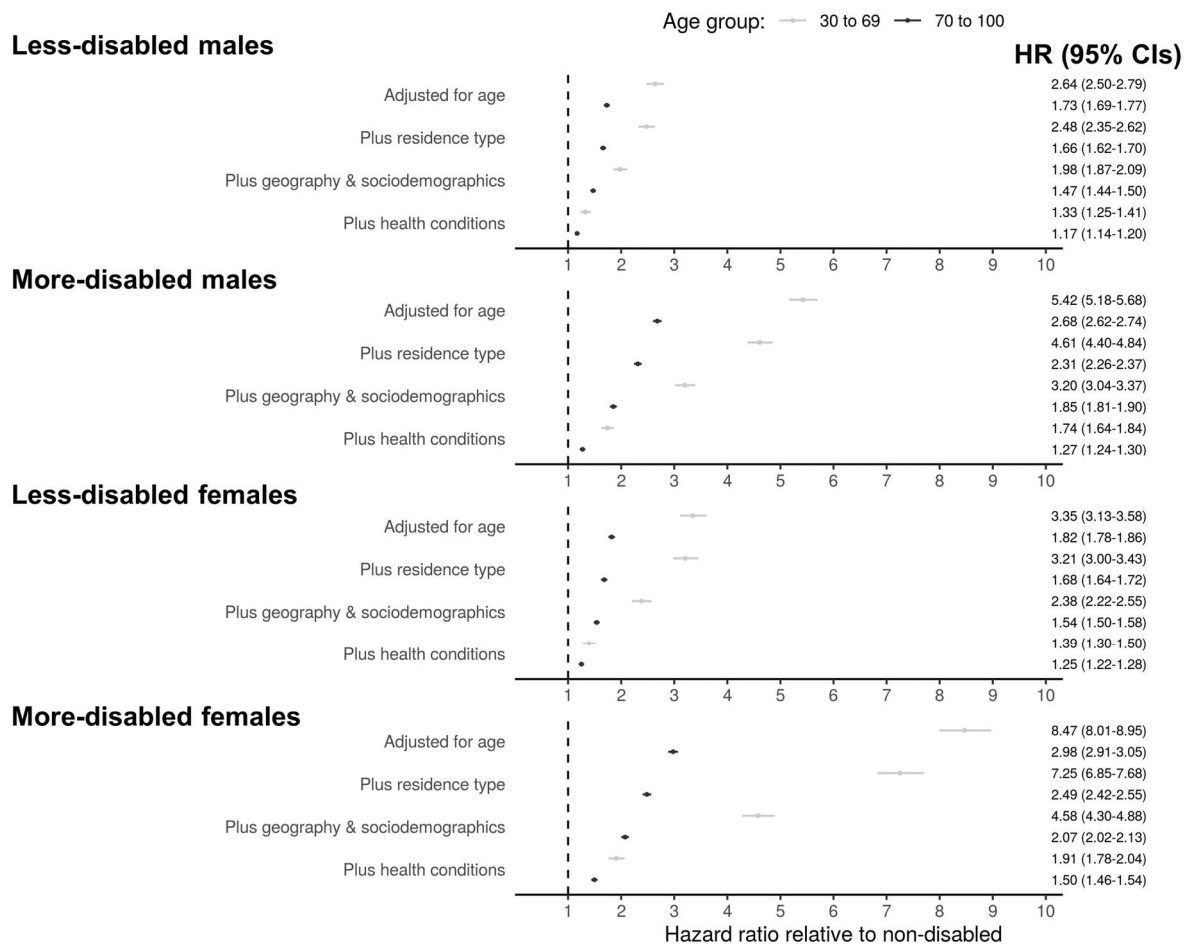

**Figure S2.** Hazard ratios for COVID-19 related mortality for less-disabled and more-disabled people compared with non-disabled people in people aged 30 to 69 years or 70 to 100 years in 2020, stratified by sex. Results obtained from Cox proportional hazards regression models adjusted for; i) age, ii) plus residence type, iii) plus local authority district, population density, area deprivation, socioeconomic status (excluding NS-SEC as this only applies to people under 75 years), ethnicity, household composition, and occupational exposure, and iv) pre-existing conditions. Error bars represent 95% confidence intervals of the hazard ratios.
